# Supplementary material for: Severe immunosuppression and not a cytokine storm characterizes COVID-19 infections
Source: JCI journal article supplement (doi:10.1172/jci.insight.140329), 2020-07-20
Supplement: sd1 [file 1]

Supplemental Figure 1:

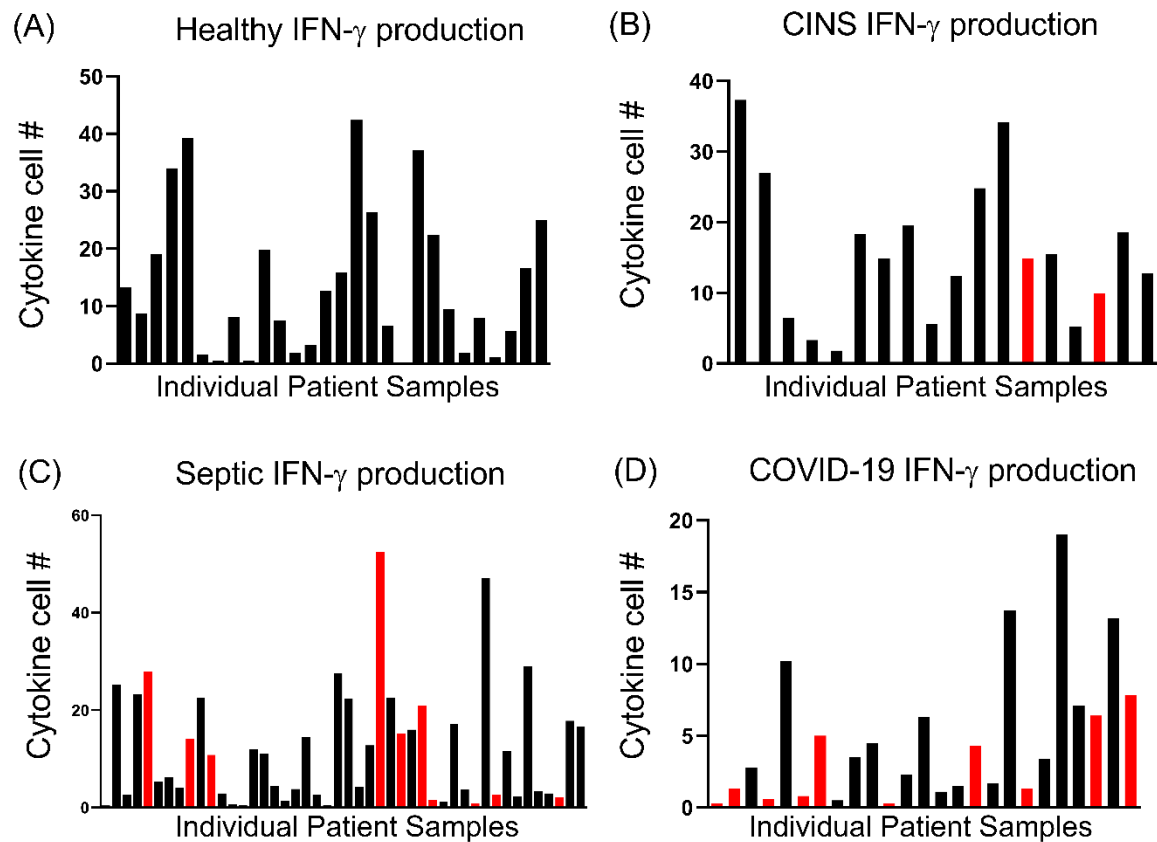

**Supplemental Figure 1. Individual patient IFN- $\gamma$  ELISpot production for healthy, CINS, septic and COVID-19**

Bar graphs for individual patient immune response, represented as number of IFN- $\gamma$  cytokine producing T cells. (A) Healthy Control (n = 27), (B) Critically ill non-septic (n = 18). (C) Septic patients (n = 46). (D) COVID-19 positive patients (n = 25). Each bar represents an individual patient. Red lines indicate patients who died. ELISpot assays were performed in duplicate for controls and triplicate for COVID-19 patients.

Supplemental Figure 2:

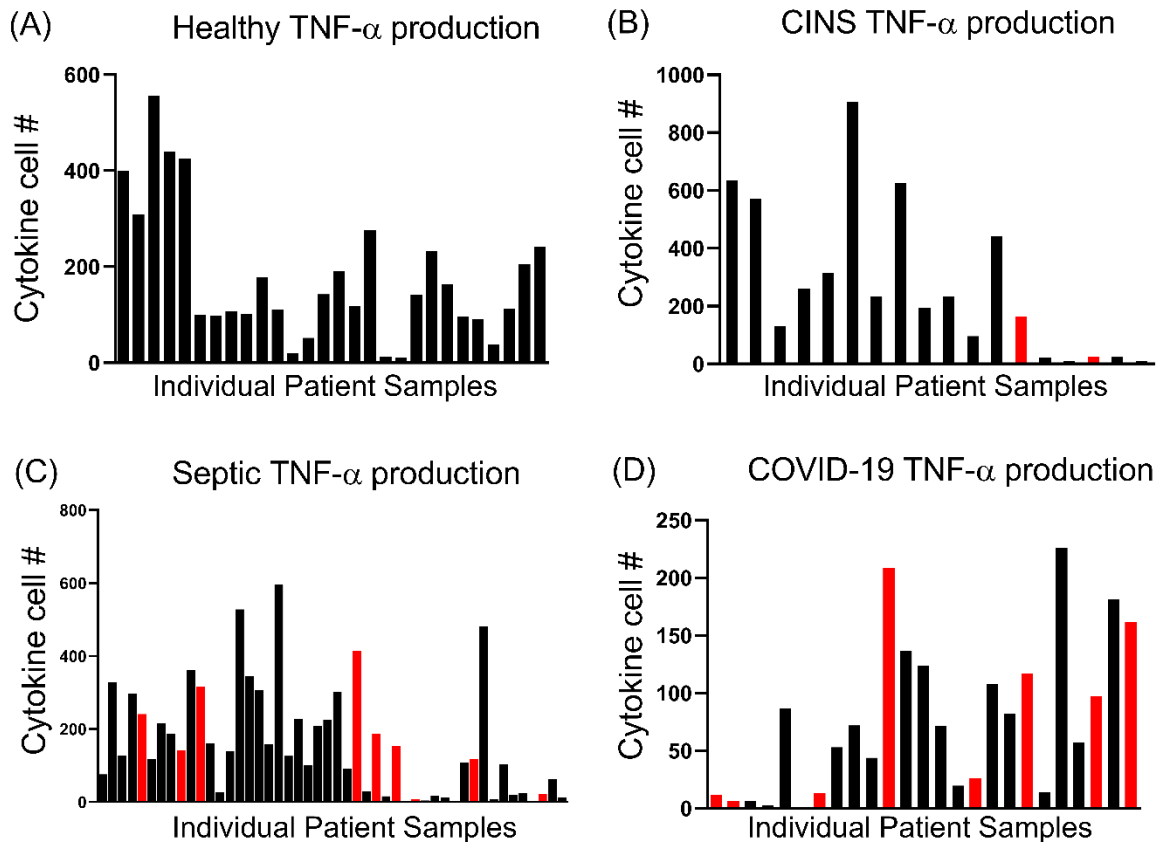

**Supplemental Figure 2. Individual patient TNF- $\alpha$  ELISpot production for healthy, CINS, septic and COVID-19**

Bar graphs for individual patient immune response, represented as number of TNF- $\alpha$  producing monocytes. (A) Healthy Controls (n = 27), (B) Critically ill non-septic (n = 18). (C) Septic patients (n = 46). (D) COVID-19 positive patients (n = 24). Each bar represents an individual patient. Red lines indicate patients who died. ELISpot assays were performed in duplicate for controls and triplicate for COVID-19 patients.

Supplemental Figure 3:

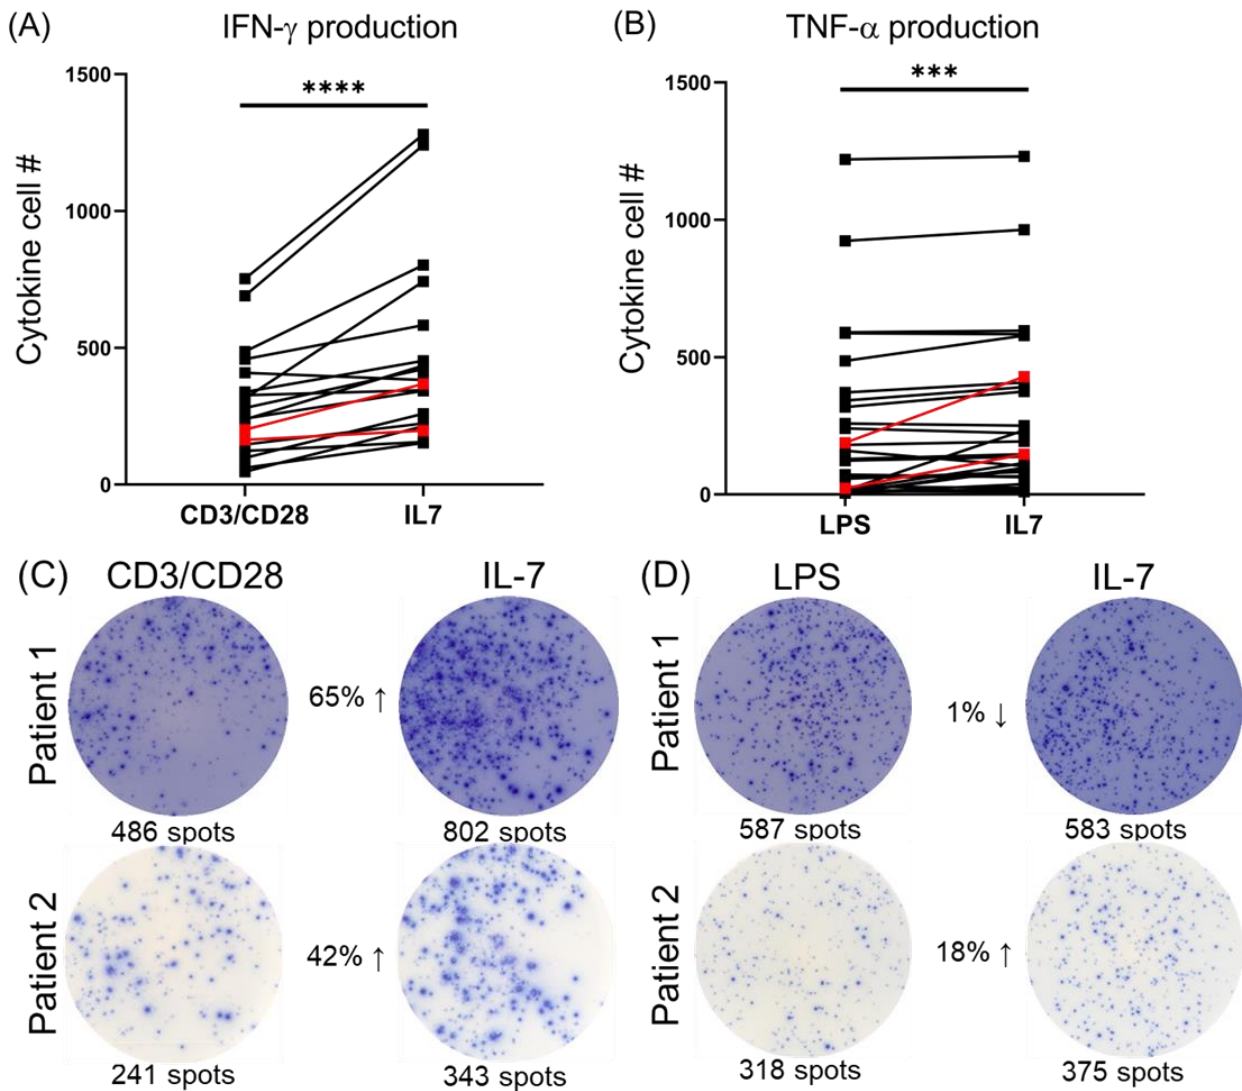

**Supplemental Figure 3. IL-7 Effect on the innate and adaptive immune function in critically ill non-septic patients.**

Line plot demonstrating change in number of cytokine producing cells using ELISpot between control (anti-CD3/anti-CD28 antibody or LPS) samples and stimulation with IL-7 for IFN- $\gamma$  (A) and TNF- $\alpha$  (B). Panels (C), (D) are representative photomicrographs demonstrating ELISpot change from control sample to IL-7 stimulated for IFN- $\gamma$  and TNF- $\alpha$ . Paired samples were analyzed using a paired rank sum Wilcoxon test. IFN- $\gamma$  n= 25, TNF- $\alpha$  n=25.

Supplemental Figure 4:

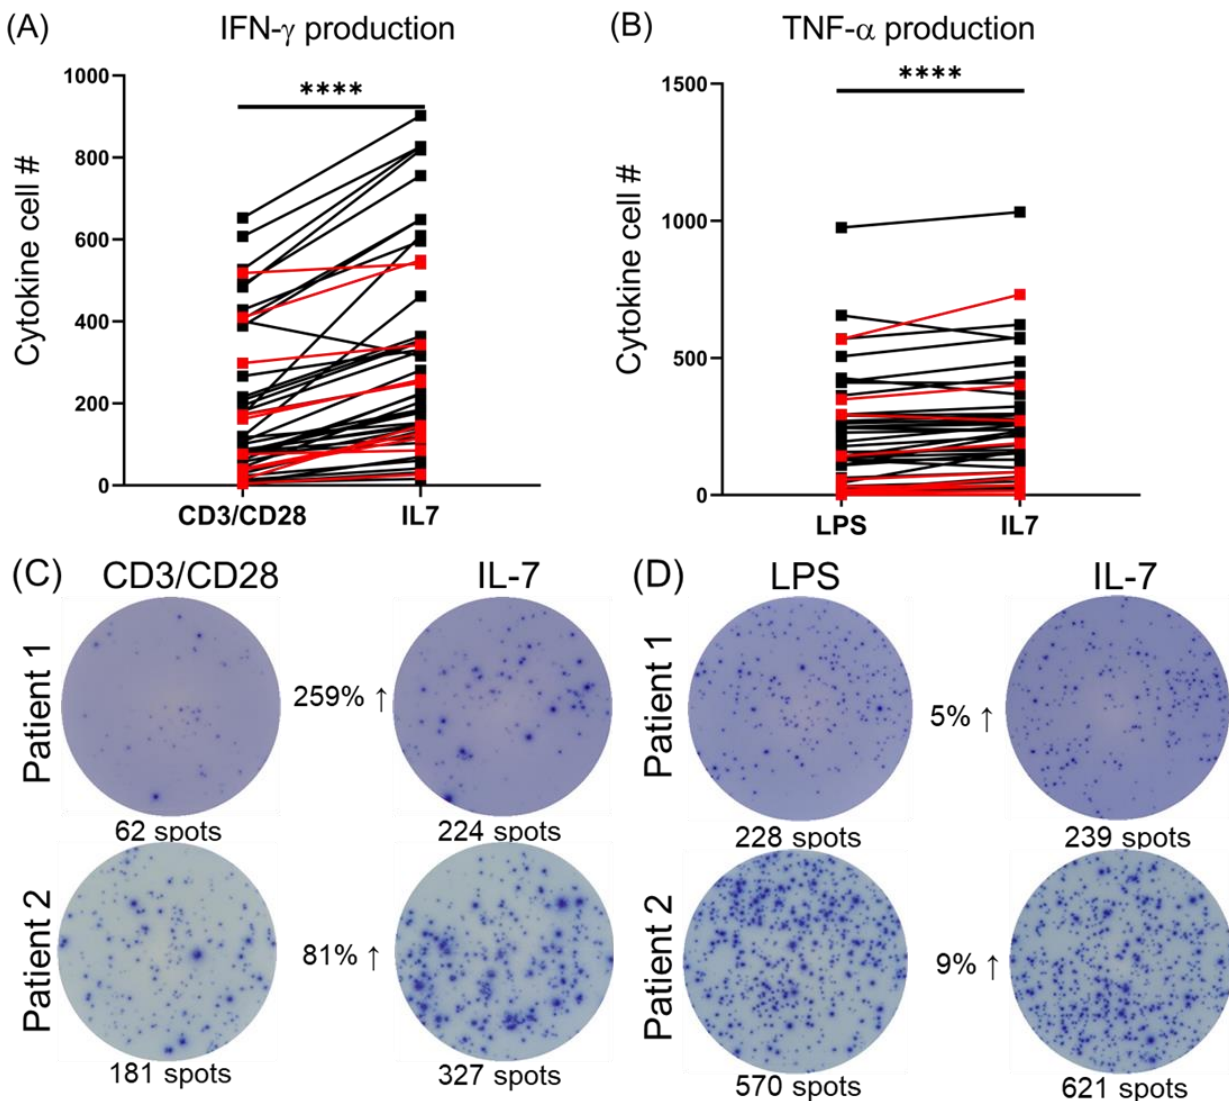

**Supplemental Figure 4. IL-7 Effect on the innate and adaptive immune function in septic patients.**

Line plot demonstrating change in number of cytokine producing cells using ELISpot between control (anti-CD3/anti-CD28 antibody or LPS) samples and stimulation with IL-7 for IFN- $\gamma$  (A) and TNF- $\alpha$  (B). Panels (C), (D) are representative photomicrographs demonstrating ELISpot change from control sample to IL-7 stimulated for IFN- $\gamma$  and TNF- $\alpha$ . Each dot represents an individual patient. Red lines represent patients who died. Paired samples were analyzed using a paired rank sum Wilcoxon test. IFN- $\gamma$  n= 25, TNF- $\alpha$  n=25.

Supplemental Figure 5:

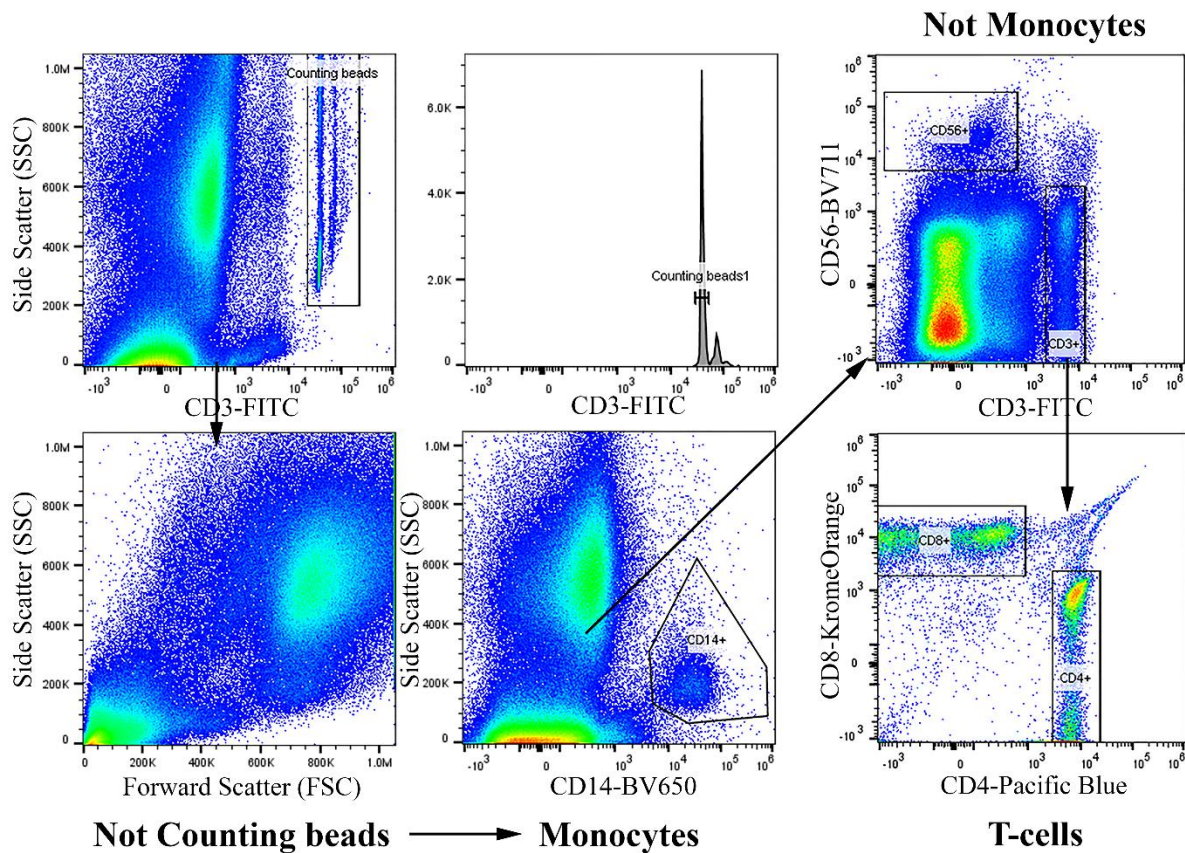

**Supplemental Figure 5. LUCID DURA flow tube gating strategy.**

Scatter plot for gating with FITC x SSC and histogram for singlets (counting beads1). All events that did not fall into the initial counting bead gate went through doublet discrimination (FSC-A x FSC-W, and then SSC-A x SSC-W) and were then examined for CD14 expression; these CD14<sup>+</sup> cells were used to calculate number of monocytes. All events that were not CD14<sup>+</sup> were then examined for CD56<sup>+</sup> positivity (Used to calculate number of NK cells) and CD3 positivity (Used to calculate number of CD3<sup>+</sup> T cells, CD56<sup>+</sup>CD3<sup>+</sup> events were excluded). CD3<sup>+</sup>CD56<sup>-</sup> events were then further interrogated for CD4 or CD8 single positivity. Absolute cell counts were determined using the counting beads according to manufacturer instructions.



Supplemental Figure 6:

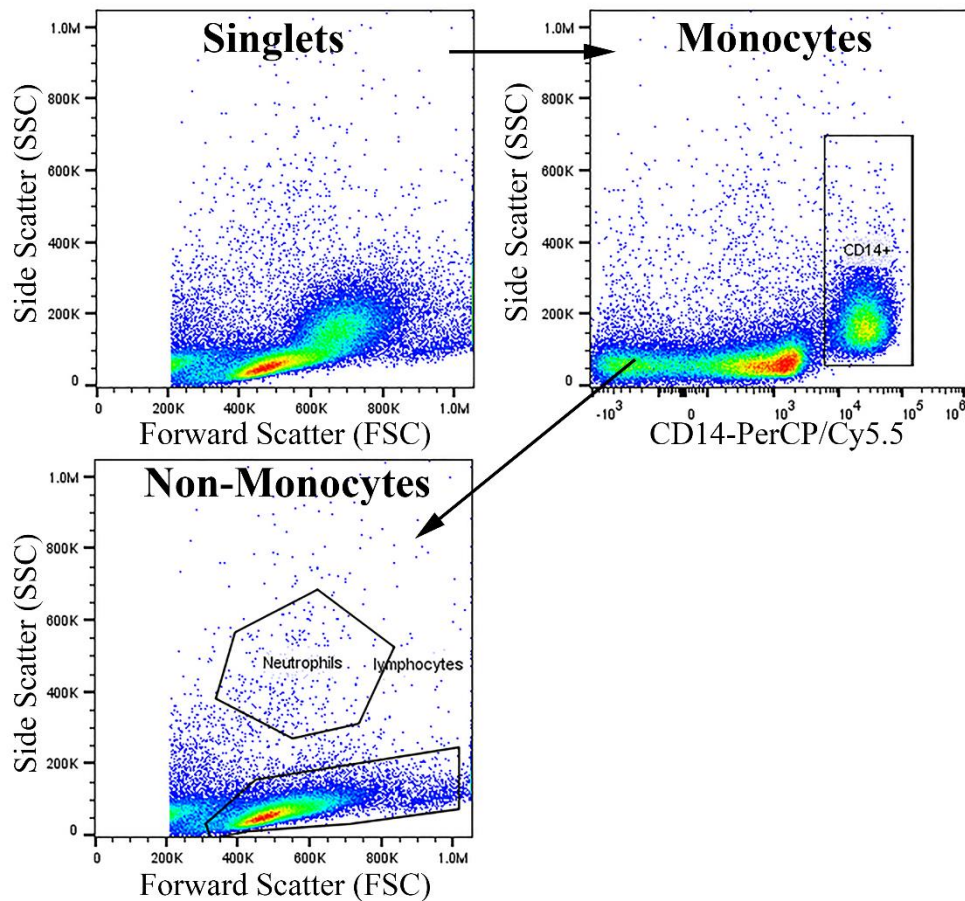

#### Supplemental Figure 6. PBMC gating strategy

Following doublet discrimination, PBMCs were gated for CD14 positivity. CD14<sup>+</sup> cells were considered monocytes. All events not falling into the CD14<sup>+</sup> gate were then examined on a FSC x SSC plot. Neutrophils and Lymphocytes were gated. Percentage of the whole singlet gate was then taken for use in determining cell number input in ELISpot assays.

| Abbreviation | Explanation                                 |
|--------------|---------------------------------------------|
| PNA          | Pneumonia                                   |
| UTI          | Urinary Tract Infection                     |
| MRSA         | Methicillin-Resistant Staphylococcus Aureus |
| MSSA         | Methicillin-Sensitive Staphylococcus Aureus |
| VAP          | Ventilator-Associated Pneumonia             |
| COVID-19     | 2019 Novel Coronavirus                      |
| CAP          | Community-Acquired Pneumonia                |
| ARDS         | Acute Respiratory Distress Syndrome         |
| SIRS         | Systemic Inflammatory Response Syndrome     |
| ARF          | Acute Respiratory Failure                   |
| AHRF         | Acute Hypoxemic Respiratory Failure         |
| MVC          | Motor Vehicle Crash                         |

Supplemental Table 1

| COVID-19 ICU Patients (n=27) |     |     |                                                                                                                |
|------------------------------|-----|-----|----------------------------------------------------------------------------------------------------------------|
| COVID-19 Patients            | Age | Sex | Primary Diagnosis                                                                                              |
| Patient 1                    | 57  | M   | Acute hypoxemic respiratory failure secondary to adult respiratory distress syndrome due to COVID-19 pneumonia |
| Patient 2                    | 57  | F   | CAP, viral pneumonia                                                                                           |
| Patient 3                    | 40  | F   | Acute respiratory distress syndrome (ARDS) due to COVID-19 virus                                               |
| Patient 4                    | 67  | M   | Acute hypoxemic respiratory failure secondary to ARDS/COVID-19 pneumonia                                       |
| Patient 5                    | 47  | M   | acute hypoxemic respiratory failure/ARDS secondary to COVID-19                                                 |
| Patient 6                    | 52  | F   | Pneumonia due to COVID-19 virus                                                                                |
| Patient 7                    | 29  | F   | ARDS, COVID19+, transaminitis, metabolic acidosis, lactic acidosis + starvation ketosis, hyponatremia          |
| Patient 8                    | 49  | M   | SIRS, Viral pneumonia vs bacterial, ARF                                                                        |
| Patient 9                    | 84  | M   | AHRF, COVID-19, ARDS,                                                                                          |
| Patient 10                   | 69  | F   | AHRF, COVID19, transaminitis, acute kidney injury                                                              |
| Patient 11                   | 25  | M   | Acute hypoxemic respiratory failure secondary to COVID-19 pneumonia                                            |
| Patient 12                   | 33  | F   | COVID-19                                                                                                       |
| Patient 13                   | 57  | M   | COVID-19 virus infection                                                                                       |
| Patient 14                   | 61  | M   | Pneumonia due to COVID-19 virus                                                                                |
| Patient 15                   | 70  | M   | covid-19 viral pneumonia, acute hypoxemic resp failure                                                         |
| Patient 16                   | 34  | M   | Acute hypoxemic respiratory failure due to ARDS, COVID-19 pneumonia                                            |
| Patient 17                   | 64  | M   | Pneumonia due to COVID-19 virus                                                                                |
| Patient 18                   | 79  | M   | Acute hypoxemic respiratory failure: ARDS due to COVID-19 pneumonia                                            |
| Patient 19                   | 68  | F   | respiratory failure secondary to COVID-19                                                                      |
| Patient 20                   | 62  | F   | Acute hypoxemic respiratory failure, COVID-19, sepsis, acute renal failure                                     |
| Patient 21                   | 67  | M   | acute hypoxemic respiratory failure/ARDS secondary to COVID-19                                                 |
| Patient 22                   | 71  | M   | acute hypoxemic respiratory failure/ARDS secondary to COVID-19                                                 |
| Patient 23                   | 51  | F   | acute hypoxemic respiratory failure/ARDS secondary to COVID-19                                                 |
| Patient 24                   | 59  | F   | acute hypoxemic respiratory failure/ARDS secondary to COVID-19                                                 |
| Patient 25                   | 64  | F   | acute hypoxemic respiratory failure/ARDS secondary to COVID-19                                                 |
| Patient 26                   | 53  | F   | acute hypoxemic respiratory failure/ARDS secondary to COVID-19                                                 |
| Patient 27                   | 86  | M   | acute hypoxemic respiratory failure/ARDS secondary to COVID-19                                                 |



Supplemental Table 2

| Septic Patients (n=51) |     |     |                                                                 |                       |                                                                                                      |
|------------------------|-----|-----|-----------------------------------------------------------------|-----------------------|------------------------------------------------------------------------------------------------------|
| Septic Subjects        | Age | Sex | Primary Diagnosis                                               | Source of Infection   | Organism                                                                                             |
| Patient 1              | 36  | F   | Jaundice                                                        | PNA                   | Unknown                                                                                              |
| Patient 2              | 40  | F   | Necrotizing Soft Tissue Infection                               | Necrotizing Fasciitis | Streptococcus agalactiae                                                                             |
| Patient 3              | 39  | M   | Small Bowel Obstruction                                         | Peritonitis           | Unknown                                                                                              |
| Patient 4              | 49  | M   | Motor Vehicle Collision                                         | Wound Infection       | Enterococcus faecium, Fusarium, Mycobacterium smegmatis, Exophiala                                   |
| Patient 5              | 89  | F   | Mesenteric Ischemia                                             | Peritonitis           | Yeast, Klebsiella pneumoniae, Bacteroides fragilis group                                             |
| Patient 6              | 54  | M   | Acute Respiratory Failure with Hypoxia                          | PNA                   | Influenza                                                                                            |
| Patient 7              | 73  | F   | Mesenteric Ischemia                                             | Peritonitis           | Unknown                                                                                              |
| Patient 8              | 69  | F   | Necrotizing Fasciitis                                           | Necrotizing Fasciitis | Escherichia coli, Streptococcus anginosus, Bacteroides fragilis group                                |
| Patient 9              | 79  | F   | Motor Vehicle Collision                                         | PNA                   | MRSA                                                                                                 |
| Patient 10             | 31  | F   | Acute Encephalopathy                                            | PNA                   | MSSA                                                                                                 |
| Patient 11             | 58  | F   | Small Bowel Obstruction                                         | Peritonitis           | Unknown                                                                                              |
| Patient 12             | 22  | M   | Sacral Fracture Closed                                          | UTI                   | Escherichia coli                                                                                     |
| Patient 13             | 54  | F   | Septic Shock                                                    | PNA                   | MRSA                                                                                                 |
| Patient 14             | 26  | M   | Traumatic Brain Injury                                          | PNA                   | MSSA                                                                                                 |
| Patient 15             | 44  | M   | Bowel Perforation                                               | Peritonitis           | Escherichia coli, Streptococcus constellatus, Bacteroides fragilis group                             |
| Patient 16             | 33  | F   | Esophageal Perforation                                          | Mediastinitis         | Coagulase negative staphylococcus species, Candida albicans                                          |
| Patient 17             | 75  | M   | Septic Shock - Urinary Tract Infection                          | UTI                   | Proteus mirabilis                                                                                    |
| Patient 18             | 54  | M   | Spinal Cord Compression                                         | PNA                   | Yeast                                                                                                |
| Patient 19             | 39  | M   | Intraabdominal Fluid Collection                                 | Peritonitis           | Coagulase negative staphylococcus                                                                    |
| Patient 20             | 62  | F   | Acute Hypoxemic Respiratory Failure                             | PNA                   | MSSA                                                                                                 |
| Patient 21             | 40  | M   | Septic Shock                                                    | VAP                   | MSSA                                                                                                 |
| Patient 22             | 33  | M   | Pneumoperitoneum                                                | Peritonitis           | Coagulase negative staphylococcus                                                                    |
| Patient 23             | 57  | M   | Stroke                                                          | UTI                   | Enterobacter cloacae complex                                                                         |
| Patient 24             | 79  | M   | Septic Shock                                                    | PNA                   | Streptococcus pneumoniae                                                                             |
| Patient 25             | 18  | F   | Diffuse Axonal Brain Injury                                     | PNA                   | MSSA                                                                                                 |
| Patient 26             | 82  | F   | Acute Hypoxemic Respiratory Failure due to Multifocal Pneumonia | PNA                   | Unknown                                                                                              |
| Patient 27             | 54  | F   | Septic Shock                                                    | UTI                   | Pseudomonas Aeruginosa, Enterococcus Faecalis                                                        |
| Patient 28             | 83  | F   | Mixed Shock of Unknown Etiology                                 | Unknown               | Unknown                                                                                              |
| Patient 29             | 54  | M   | Intraparenchymal Hemorrhage                                     | Peritonitis           | Unknown                                                                                              |
| Patient 30             | 63  | M   | Weakness                                                        | Necrotizing Fasciitis | Enterobacter species                                                                                 |
| Patient 31             | 60  | F   | Decompensated Hepatic Cirrhosis                                 | Unknown               | Unknown                                                                                              |
| Patient 32             | 59  | M   | Acute Respiratory Failure with Hypoxia                          | PNA                   | Parainfluenza 3                                                                                      |
| Patient 33             | 72  | M   | Spontaneous Bacterial Peritonitis                               | Peritonitis           | Other Staphylococcus species                                                                         |
| Patient 34             | 59  | M   | Hepatic Cirrhosis                                               | PNA                   | Haemophilus influenza                                                                                |
| Patient 35             | 68  | F   | Respiratory Failure                                             | PNA                   | Enterobacter species                                                                                 |
| Patient 36             | 46  | M   | Acute Liver Failure                                             | Peritonitis           | Other Staphylococcus species                                                                         |
| Patient 37             | 66  | F   | GI Bleed                                                        | Wound Infection       | Acinetobacter, Pseudomonas, Enterococcus faecium, Bacteroides fragilis, Stenotrophomonas maltophilia |
| Patient 38             | 57  | M   | Respiratory Failure                                             | Peritonitis           | Mixed gram positive microorganisms                                                                   |
| Patient 39             | 78  | F   | Septic Shock                                                    | PNA                   | Escherichia coli, MRSA                                                                               |
| Patient 40             | 62  | F   | Pneumatoxis Coli                                                | Peritonitis           | Staphylococcus species                                                                               |
| Patient 41             | 64  | F   | MSSA Bacteremia                                                 | Wound Infection       | Staphylococcus aureus                                                                                |
| Patient 42             | 72  | M   | Arterial Thromboembolism                                        | Peritonitis           | Unknown                                                                                              |
| Patient 43             | 62  | F   | Toxic Metabolic Encephalopathy                                  | Peritonitis           | Unknown                                                                                              |
| Patient 44             | 59  | F   | Acute on Chronic Respiratory Failure                            | Wound Infection       | Staphylococcus epidermidis                                                                           |
| Patient 45             | 28  | F   | Diabetic Ketoacidosis                                           | PNA                   | Unknown                                                                                              |
| Patient 46             | 75  | M   | Septic Shock                                                    | PNA                   | Coronavirus HKU1 RNA                                                                                 |
| Patient 47             | 87  | F   | Sepsis due to Urinary Tract Infection                           | UTI                   | Enterobacter species                                                                                 |
| Patient 48             | 66  | F   | Perforated Diverticulum                                         | Peritonitis           | Unknown                                                                                              |
| Patient 49             | 59  | M   | Septic Shock                                                    | UTI                   | Escherichia coli                                                                                     |
| Patient 50             | 59  | F   | Septic Shock                                                    | PNA                   | Streptococcus species                                                                                |
| Patient 51             | 37  | M   | Necrotizing Pancreatitis                                        | UTI                   | Escherichia coli, Enterococcus faecalis                                                              |

Supplemental Table 3

| <b>Critically Ill Non-Septic Patients (n=18)</b> |            |            |                                                          |
|--------------------------------------------------|------------|------------|----------------------------------------------------------|
| <b>Critically Ill Patients</b>                   | <b>Age</b> | <b>Sex</b> | <b>Primary Diagnosis</b>                                 |
| Patient 1                                        | 57         | M          | Polytrauma, Skull Fracture and Subarachnoid Hemorrhage   |
| Patient 2                                        | 36         | M          | Surgical Repair for Closed Fracture of Thyroid Cartilage |
| Patient 3                                        | 56         | M          | Pelvic Ring Fracture                                     |
| Patient 4                                        | 64         | F          | Popliteal Arterial Occlusion, left                       |
| Patient 5                                        | 56         | M          | Motor Vehicle Collision                                  |
| Patient 6                                        | 23         | F          | Desmoid Tumor Resection, paraspinal                      |
| Patient 7                                        | 40         | M          | Closed Non-displaced Fracture C6                         |
| Patient 8                                        | 61         | M          | Retroperitoneal Hematoma, distal aorta                   |
| Patient 9                                        | 80         | M          | Ruptured Abdominal Aortic Aneurysm                       |
| Patient 10                                       | 61         | M          | Motor Vehicle Collision                                  |
| Patient 11                                       | 54         | F          | Lumbar Spinal Stenosis with Neurogenic Claudication      |
| Patient 12                                       | 62         | F          | Arterial Occlusion                                       |
| Patient 13                                       | 61         | M          | Ruptured Abdominal Aortic Aneurysm                       |
| Patient 14                                       | 70         | F          | Arterial Occlusion                                       |
| Patient 15                                       | 62         | M          | Popliteal Arterial Occlusion, left                       |
| Patient 16                                       | 63         | M          | Arterial Occlusion, lower extremity                      |
| Patient 17                                       | 75         | M          | Central Cord Syndrome                                    |
| Patient 18                                       | 77         | F          | Pulmonary Artery Saddle Embolus                          |

Supplemental Table 4

|                            |           |     |
|----------------------------|-----------|-----|
| <b>Septic Total</b>        | <b>51</b> |     |
| <b>Primary Diagnosis</b>   |           |     |
| Infectious disease         | 19        | 37% |
| Gastrointestinal disease   | 7         | 14% |
| Respiratory disease        | 7         | 14% |
| Trauma (MVC, Fractures)    | 5         | 10% |
| Liver Disease              | 4         | 8%  |
| Neurologic disease         | 4         | 8%  |
| Clotting/Bleeding disorder | 2         | 4%  |
| Metabolic disorder         | 1         | 2%  |
| Spinal cord injury/disease | 1         | 2%  |
| Shock                      | 1         | 2%  |
| <b>Source of Infection</b> |           |     |
| PNA/VAP                    | 19        | 37% |
| Peritonitis                | 15        | 29% |
| UTI                        | 7         | 14% |
| Wound Infection            | 4         | 8%  |
| Necrotizing Fasciitis      | 3         | 6%  |
| Unknown                    | 2         | 4%  |
| Mediastinitis              | 1         | 2%  |

|                                        |           |     |
|----------------------------------------|-----------|-----|
| <b>Critically Ill Non-Septic Total</b> | <b>18</b> |     |
| <b>Primary Diagnosis</b>               |           |     |
| Trauma (MVC, Fractures)                | 6         | 33% |
| Peripheral vascular disease            | 5         | 28% |
| Spinal cord injury/disease             | 2         | 11% |
| Cardiovascular disease                 | 2         | 11% |
| Clotting/Bleeding disorder             | 2         | 11% |
| Neoplasm (nonmalignant)                | 1         | 6%  |
